# Supplementary material for: Trinuclear copper(I) complexes with triscarbene ligands: catalysis of C–N and C–C coupling reactions
Source: Royal Society of Chemistry journal article supplement (doi:10.1039/b906730b), 2009-01-01
Supplement: b906730b.pdf [file b906730b.pdf]

## Supplementary Information

### Trinuclear copper(I) complexes with triscarbene ligands: catalysis of C-N and C-C coupling reactions

Andrea Biffis,<sup>\*a</sup> Cristina Tubaro,<sup>a</sup> Elena Scattolin,<sup>a</sup> Marino Basato,<sup>a</sup> Grazia Papini,<sup>b</sup> Carlo Santini,<sup>\*b</sup> Eleuterio Alvarez,<sup>c</sup> Salvador Conejero,<sup>c</sup>

<sup>a</sup>*Dipartimento di Scienze Chimiche, Università di Padova, via Marzolo 1, I – 35131, Padova, Italy. Fax: (+39) 049 8275216; Tel: (+39) 049 8275223; E-mail: andrea.biffis@unipd.it*

<sup>b</sup>*Dipartimento di Scienze Chimiche, Università di Camerino, Via S. Agostino 1, 62032 Camerino (MC), Italy.*

<sup>c</sup>*Instituto de Investigaciones Químicas, Departamento de Química Inorgánica, CSIC and Universidad de Sevilla, Avda. Americo Vespucio 49, 41092 Sevilla, Spain.*

Full listing of atomic coordinates, bond distances and angles for the reported structure of complex  $[\text{Cu}_3\{\text{HB}(\text{MeIm})_3\}_2](\text{PF}_6)$  **1-PF<sub>6</sub>**.

Table 1. Crystal data and structure refinement for  $[\text{Cu}_3\{\text{HB}(\text{MeIm})_3\}_2](\text{PF}_6)$ .

|                                   |                                                                                                                                                                          |
|-----------------------------------|--------------------------------------------------------------------------------------------------------------------------------------------------------------------------|
| Empirical formula                 | $\text{C}_{24}\text{H}_{32}\text{B}_2\text{Cu}_3\text{F}_6\text{N}_{12}\text{P}$<br>$[\text{C}_{24}\text{H}_{32}\text{B}_2\text{Cu}_3\text{N}_{12}, \text{F}_6\text{P}]$ |
| Formula weight                    | 845.83                                                                                                                                                                   |
| Temperature                       | 173(2) K                                                                                                                                                                 |
| Wavelength                        | 0.71073 Å                                                                                                                                                                |
| Crystal system                    | Triclinic                                                                                                                                                                |
| Space group                       | $\text{P}\bar{1}$                                                                                                                                                        |
| Unit cell dimensions              | $a = 14.1659(6)$ Å $\alpha = 86.9100(10)^\circ$ .<br>$b = 15.2179(8)$ Å $\beta = 76.3670(10)^\circ$ .<br>$c = 16.9149(9)$ Å $\gamma = 73.9790(10)^\circ$ .               |
| Volume                            | 3405.8(3) Å <sup>3</sup>                                                                                                                                                 |
| Z                                 | 4                                                                                                                                                                        |
| Density (calculated)              | 1.650 Mg/m <sup>3</sup>                                                                                                                                                  |
| Absorption coefficient            | 1.973 mm <sup>-1</sup>                                                                                                                                                   |
| F(000)                            | 1704                                                                                                                                                                     |
| Crystal size                      | 0.25 x 0.13 x 0.13 mm <sup>3</sup>                                                                                                                                       |
| Theta range for data collection   | 1.77 to 30.42°.                                                                                                                                                          |
| Index ranges                      | -20 ≤ h ≤ 14, -21 ≤ k ≤ 21, -24 ≤ l ≤ 24                                                                                                                                 |
| Reflections collected             | 55191                                                                                                                                                                    |
| Independent reflections           | 20099 [R(int) = 0.0306]                                                                                                                                                  |
| Completeness to theta = 30.42°    | 98.4 %                                                                                                                                                                   |
| Absorption correction             | Semi-empirical from equivalents                                                                                                                                          |
| Max. and min. transmission        | 0.7735 and 0.7382                                                                                                                                                        |
| Refinement method                 | Full-matrix-block least-squares on F <sup>2</sup>                                                                                                                        |
| Data / restraints / parameters    | 20099 / 0 / 865                                                                                                                                                          |
| Goodness-of-fit on F <sup>2</sup> | 1.060                                                                                                                                                                    |
| Final R indices [I > 2σ(I)]       | R1 = 0.0462, wR2 = 0.1281                                                                                                                                                |
| R indices (all data)              | R1 = 0.0623, wR2 = 0.1459                                                                                                                                                |
| Largest diff. peak and hole       | 1.447 and -0.956 e.Å <sup>-3</sup>                                                                                                                                       |

Table 2. Atomic coordinates ( $\times 10^4$ ) and equivalent isotropic displacement parameters ( $\text{\AA}^2 \times 10^3$ ) for ea03305b.  $U(\text{eq})$  is defined as one third of the trace of the orthogonalized  $U^{ij}$  tensor.

|       | x       | y       | z       | U(eq) |
|-------|---------|---------|---------|-------|
| Cu(1) | 6627(1) | 8053(1) | 4842(1) | 31(1) |
| Cu(2) | 7929(1) | 6459(1) | 4207(1) | 32(1) |
| Cu(3) | 5938(1) | 6853(1) | 4265(1) | 27(1) |
| N(1)  | 5689(4) | 7080(4) | 6248(3) | 38(1) |
| N(2)  | 4726(4) | 8409(4) | 6055(3) | 39(1) |
| N(3)  | 7597(4) | 6362(4) | 5997(3) | 42(1) |
| N(4)  | 9029(4) | 6594(4) | 5427(4) | 47(1) |
| N(5)  | 6483(4) | 5525(3) | 5545(3) | 38(1) |
| N(6)  | 6338(4) | 4881(3) | 4477(3) | 40(1) |
| N(7)  | 7754(4) | 8402(3) | 3178(3) | 33(1) |
| N(8)  | 8293(4) | 8825(3) | 4152(3) | 34(1) |
| N(9)  | 7664(4) | 6959(3) | 2528(3) | 32(1) |
| N(10) | 8333(4) | 5523(4) | 2677(3) | 41(1) |
| N(11) | 6056(4) | 8277(3) | 3002(3) | 30(1) |
| N(12) | 4544(4) | 8413(3) | 3720(3) | 34(1) |
| B(1)  | 6534(5) | 6184(6) | 6185(4) | 43(2) |
| B(2)  | 7206(5) | 8008(5) | 2651(4) | 33(1) |
| C(1)  | 5651(4) | 7824(4) | 5767(3) | 33(1) |
| C(2)  | 4790(5) | 7208(6) | 6842(4) | 51(2) |
| C(3)  | 4196(5) | 8035(5) | 6711(4) | 48(2) |
| C(4)  | 4353(6) | 9320(5) | 5766(5) | 49(2) |
| C(5)  | 8190(4) | 6445(4) | 5260(4) | 37(1) |
| C(6)  | 8055(6) | 6476(6) | 6606(4) | 58(2) |
| C(7)  | 8954(6) | 6609(7) | 6250(5) | 61(2) |
| C(8)  | 9920(5) | 6643(6) | 4807(5) | 59(2) |
| C(9)  | 6234(4) | 5713(4) | 4809(3) | 31(1) |
| C(10) | 6741(5) | 4570(5) | 5632(6) | 59(2) |
| C(11) | 6656(5) | 4190(4) | 4987(6) | 55(2) |
| C(12) | 6113(6) | 4764(5) | 3694(5) | 53(2) |
| C(13) | 7580(4) | 8452(4) | 4005(3) | 29(1) |
| C(14) | 8568(5) | 8744(5) | 2829(4) | 45(2) |
| C(15) | 8903(5) | 9011(5) | 3429(4) | 47(2) |
| C(16) | 8377(6) | 9033(5) | 4961(4) | 49(2) |

|       |         |          |          |       |
|-------|---------|----------|----------|-------|
| C(17) | 7959(4) | 6338(4)  | 3085(3)  | 32(1) |
| C(18) | 7880(5) | 6526(5)  | 1783(3)  | 40(1) |
| C(19) | 8295(5) | 5637(6)  | 1870(4)  | 51(2) |
| C(20) | 8768(6) | 4654(5)  | 3027(5)  | 58(2) |
| C(21) | 5516(4) | 7897(3)  | 3627(3)  | 26(1) |
| C(22) | 5405(5) | 9023(4)  | 2716(4)  | 40(1) |
| C(23) | 4469(6) | 9100(4)  | 3161(4)  | 46(2) |
| C(24) | 3688(4) | 8233(5)  | 4318(4)  | 41(1) |
| Cu(4) | 1549(1) | 8357(1)  | 937(1)   | 28(1) |
| Cu(5) | 3212(1) | 8896(1)  | 1043(1)  | 27(1) |
| Cu(6) | 3331(1) | 7223(1)  | 441(1)   | 33(1) |
| N(13) | 1823(3) | 7003(3)  | 2259(3)  | 31(1) |
| N(14) | 852(4)  | 6769(4)  | 1525(3)  | 40(1) |
| N(15) | 2227(3) | 8414(3)  | 2703(3)  | 28(1) |
| N(16) | 1943(3) | 9867(3)  | 2522(3)  | 29(1) |
| N(17) | 3655(3) | 7006(3)  | 2130(3)  | 30(1) |
| N(18) | 5038(4) | 6650(3)  | 1193(3)  | 37(1) |
| N(19) | 2063(3) | 9638(3)  | -395(2)  | 26(1) |
| N(20) | 862(3)  | 10267(3) | 618(3)   | 30(1) |
| N(21) | 3949(3) | 8829(3)  | -761(3)  | 32(1) |
| N(22) | 5133(3) | 8711(4)  | -126(3)  | 35(1) |
| N(23) | 2677(3) | 8046(3)  | -1035(3) | 28(1) |
| N(24) | 2385(4) | 6722(3)  | -770(3)  | 41(1) |
| B(3)  | 2551(5) | 7357(4)  | 2627(4)  | 31(1) |
| B(4)  | 2925(4) | 8962(4)  | -999(3)  | 29(1) |
| C(25) | 1404(4) | 7341(4)  | 1627(3)  | 31(1) |
| C(26) | 1523(5) | 6228(5)  | 2546(4)  | 47(2) |
| C(27) | 899(6)  | 6093(5)  | 2105(5)  | 52(2) |
| C(28) | 202(6)  | 6916(6)  | 950(5)   | 53(2) |
| C(29) | 2442(4) | 9050(3)  | 2142(3)  | 26(1) |
| C(30) | 1612(4) | 8843(4)  | 3415(3)  | 34(1) |
| C(31) | 1437(4) | 9759(4)  | 3300(3)  | 36(1) |
| C(32) | 1989(5) | 10752(4) | 2168(4)  | 40(1) |
| C(33) | 4017(4) | 6950(4)  | 1311(3)  | 31(1) |
| C(34) | 4463(4) | 6726(4)  | 2504(4)  | 38(1) |
| C(35) | 5312(5) | 6506(5)  | 1929(4)  | 44(1) |
| C(36) | 5737(5) | 6443(6)  | 398(5)   | 57(2) |
| C(37) | 1494(4) | 9446(3)  | 324(3)   | 26(1) |

|       |          |          |          |         |
|-------|----------|----------|----------|---------|
| C(38) | 1804(5)  | 10566(4) | -535(4)  | 37(1)   |
| C(39) | 1047(5)  | 10970(4) | 90(4)    | 39(1)   |
| C(40) | 75(5)    | 10397(5) | 1360(4)  | 43(1)   |
| C(41) | 4116(4)  | 8855(4)  | -2(3)    | 29(1)   |
| C(42) | 4851(4)  | 8667(5)  | -1329(4) | 43(1)   |
| C(43) | 5596(5)  | 8591(5)  | -939(4)  | 45(2)   |
| C(44) | 5654(5)  | 8749(5)  | 521(4)   | 48(2)   |
| C(45) | 2789(4)  | 7340(4)  | -508(3)  | 34(1)   |
| C(46) | 2186(4)  | 7864(4)  | -1604(3) | 35(1)   |
| C(47) | 2009(5)  | 7043(5)  | -1443(4) | 45(1)   |
| C(48) | 2386(8)  | 5833(5)  | -405(5)  | 61(2)   |
| P(1)  | 8762(1)  | 1752(1)  | 3901(1)  | 39(1)   |
| F(1)  | 8347(4)  | 2291(3)  | 4745(3)  | 68(1)   |
| F(2)  | 9188(4)  | 1164(4)  | 3083(3)  | 70(1)   |
| F(3)  | 9814(5)  | 1942(6)  | 3801(4)  | 112(3)  |
| F(4)  | 7757(5)  | 1471(7)  | 4024(4)  | 133(3)  |
| F(5)  | 9199(5)  | 870(4)   | 4385(3)  | 89(2)   |
| F(6)  | 8323(9)  | 2592(5)  | 3434(4)  | 163(5)  |
| P(2)  | 1301(1)  | 3458(1)  | 921(1)   | 37(1)   |
| F(7)  | 2275(7)  | 3693(9)  | 1053(7)  | 178(5)  |
| F(8)  | 384(6)   | 3224(9)  | 810(8)   | 193(6)  |
| F(9)  | 1872(11) | 2790(8)  | 207(7)   | 224(8)  |
| F(10) | 723(8)   | 4135(8)  | 1568(9)  | 239(8)  |
| F(11) | 1513(19) | 2704(10) | 1426(11) | 319(12) |
| F(12) | 1457(13) | 4153(9)  | 266(8)   | 228(7)  |

---

Table 3. Bond lengths [Å] and angles [°] for ea03305b.

|             |            |              |           |
|-------------|------------|--------------|-----------|
| Cu(1)-C(13) | 1.912(5)   | N(10)-C(17)  | 1.361(7)  |
| Cu(1)-C(1)  | 1.915(5)   | N(10)-C(19)  | 1.379(9)  |
| Cu(1)-Cu(3) | 2.6199(9)  | N(10)-C(20)  | 1.455(10) |
| Cu(1)-Cu(2) | 2.7049(10) | N(11)-C(21)  | 1.354(6)  |
| Cu(2)-C(5)  | 1.901(6)   | N(11)-C(22)  | 1.394(7)  |
| Cu(2)-C(17) | 1.905(5)   | N(11)-B(2)   | 1.542(8)  |
| Cu(2)-Cu(3) | 2.6965(9)  | N(12)-C(21)  | 1.361(7)  |
| Cu(3)-C(9)  | 1.908(5)   | N(12)-C(23)  | 1.370(8)  |
| Cu(3)-C(21) | 1.908(5)   | N(12)-C(24)  | 1.465(8)  |
| N(1)-C(1)   | 1.355(7)   | B(1)-H(1)    | 1.0000    |
| N(1)-C(2)   | 1.397(8)   | B(2)-H(2)    | 1.0000    |
| N(1)-B(1)   | 1.535(10)  | C(2)-C(3)    | 1.348(11) |
| N(2)-C(1)   | 1.360(8)   | C(2)-H(2A)   | 0.9500    |
| N(2)-C(3)   | 1.376(8)   | C(3)-H(3)    | 0.9500    |
| N(2)-C(4)   | 1.443(9)   | C(4)-H(4A)   | 0.9800    |
| N(3)-C(5)   | 1.350(8)   | C(4)-H(4B)   | 0.9800    |
| N(3)-C(6)   | 1.382(8)   | C(4)-H(4C)   | 0.9800    |
| N(3)-B(1)   | 1.558(9)   | C(6)-C(7)    | 1.339(11) |
| N(4)-C(5)   | 1.362(7)   | C(6)-H(6)    | 0.9500    |
| N(4)-C(7)   | 1.372(9)   | C(7)-H(7)    | 0.9500    |
| N(4)-C(8)   | 1.456(9)   | C(8)-H(8A)   | 0.9800    |
| N(5)-C(9)   | 1.366(7)   | C(8)-H(8B)   | 0.9800    |
| N(5)-C(10)  | 1.406(8)   | C(8)-H(8C)   | 0.9800    |
| N(5)-B(1)   | 1.543(10)  | C(10)-C(11)  | 1.308(13) |
| N(6)-C(11)  | 1.369(9)   | C(10)-H(10)  | 0.9500    |
| N(6)-C(9)   | 1.370(7)   | C(11)-H(11)  | 0.9500    |
| N(6)-C(12)  | 1.463(9)   | C(12)-H(12A) | 0.9800    |
| N(7)-C(13)  | 1.364(7)   | C(12)-H(12B) | 0.9800    |
| N(7)-C(14)  | 1.388(7)   | C(12)-H(12C) | 0.9800    |
| N(7)-B(2)   | 1.548(7)   | C(14)-C(15)  | 1.341(9)  |
| N(8)-C(13)  | 1.363(6)   | C(14)-H(14)  | 0.9500    |
| N(8)-C(15)  | 1.386(8)   | C(15)-H(15)  | 0.9500    |
| N(8)-C(16)  | 1.459(7)   | C(16)-H(16A) | 0.9800    |
| N(9)-C(17)  | 1.352(8)   | C(16)-H(16B) | 0.9800    |
| N(9)-C(18)  | 1.382(7)   | C(16)-H(16C) | 0.9800    |
| N(9)-B(2)   | 1.553(8)   | C(18)-C(19)  | 1.333(11) |

|              |           |              |          |
|--------------|-----------|--------------|----------|
| C(18)-H(18)  | 0.9500    | N(19)-C(37)  | 1.359(6) |
| C(19)-H(19)  | 0.9500    | N(19)-C(38)  | 1.381(7) |
| C(20)-H(20A) | 0.9800    | N(19)-B(4)   | 1.558(7) |
| C(20)-H(20B) | 0.9800    | N(20)-C(37)  | 1.360(7) |
| C(20)-H(20C) | 0.9800    | N(20)-C(39)  | 1.396(7) |
| C(22)-C(23)  | 1.339(10) | N(20)-C(40)  | 1.451(7) |
| C(22)-H(22)  | 0.9500    | N(21)-C(41)  | 1.364(6) |
| C(23)-H(23)  | 0.9500    | N(21)-C(42)  | 1.374(7) |
| C(24)-H(24A) | 0.9800    | N(21)-B(4)   | 1.553(7) |
| C(24)-H(24B) | 0.9800    | N(22)-C(41)  | 1.362(7) |
| C(24)-H(24C) | 0.9800    | N(22)-C(43)  | 1.375(7) |
| Cu(4)-C(37)  | 1.900(5)  | N(22)-C(44)  | 1.468(7) |
| Cu(4)-C(25)  | 1.914(5)  | N(23)-C(45)  | 1.357(7) |
| Cu(4)-Cu(6)  | 2.6088(9) | N(23)-C(46)  | 1.392(6) |
| Cu(4)-Cu(5)  | 2.7455(9) | N(23)-B(4)   | 1.536(7) |
| Cu(5)-C(29)  | 1.911(5)  | N(24)-C(45)  | 1.368(8) |
| Cu(5)-C(41)  | 1.915(5)  | N(24)-C(47)  | 1.378(8) |
| Cu(5)-Cu(6)  | 2.7404(9) | N(24)-C(48)  | 1.456(8) |
| Cu(6)-C(45)  | 1.916(5)  | B(3)-H(3A)   | 1.0000   |
| Cu(6)-C(33)  | 1.916(5)  | B(4)-H(4)    | 1.0000   |
| N(13)-C(25)  | 1.353(7)  | C(26)-C(27)  | 1.345(9) |
| N(13)-C(26)  | 1.387(7)  | C(26)-H(26)  | 0.9500   |
| N(13)-B(3)   | 1.546(7)  | C(27)-H(27)  | 0.9500   |
| N(14)-C(25)  | 1.362(7)  | C(28)-H(28A) | 0.9800   |
| N(14)-C(27)  | 1.381(8)  | C(28)-H(28B) | 0.9800   |
| N(14)-C(28)  | 1.460(8)  | C(28)-H(28C) | 0.9800   |
| N(15)-C(29)  | 1.363(6)  | C(30)-C(31)  | 1.359(8) |
| N(15)-C(30)  | 1.383(7)  | C(30)-H(30)  | 0.9500   |
| N(15)-B(3)   | 1.549(8)  | C(31)-H(31)  | 0.9500   |
| N(16)-C(29)  | 1.359(6)  | C(32)-H(32A) | 0.9800   |
| N(16)-C(31)  | 1.366(7)  | C(32)-H(32B) | 0.9800   |
| N(16)-C(32)  | 1.455(7)  | C(32)-H(32C) | 0.9800   |
| N(17)-C(33)  | 1.358(7)  | C(34)-C(35)  | 1.329(9) |
| N(17)-C(34)  | 1.391(6)  | C(34)-H(34)  | 0.9500   |
| N(17)-B(3)   | 1.551(8)  | C(35)-H(35)  | 0.9500   |
| N(18)-C(33)  | 1.359(7)  | C(36)-H(36A) | 0.9800   |
| N(18)-C(35)  | 1.378(8)  | C(36)-H(36B) | 0.9800   |
| N(18)-C(36)  | 1.461(8)  | C(36)-H(36C) | 0.9800   |

|                   |            |                   |            |
|-------------------|------------|-------------------|------------|
| C(38)-C(39)       | 1.349(9)   | C(5)-Cu(2)-Cu(3)  | 112.05(18) |
| C(38)-H(38)       | 0.9500     | C(17)-Cu(2)-Cu(3) | 79.52(16)  |
| C(39)-H(39)       | 0.9500     | C(5)-Cu(2)-Cu(1)  | 78.92(19)  |
| C(40)-H(40A)      | 0.9800     | C(17)-Cu(2)-Cu(1) | 111.16(18) |
| C(40)-H(40B)      | 0.9800     | Cu(3)-Cu(2)-Cu(1) | 58.03(2)   |
| C(40)-H(40C)      | 0.9800     | C(9)-Cu(3)-C(21)  | 170.2(2)   |
| C(42)-C(43)       | 1.348(9)   | C(9)-Cu(3)-Cu(1)  | 111.16(17) |
| C(42)-H(42)       | 0.9500     | C(21)-Cu(3)-Cu(1) | 78.61(14)  |
| C(43)-H(43)       | 0.9500     | C(9)-Cu(3)-Cu(2)  | 75.37(15)  |
| C(44)-H(44A)      | 0.9800     | C(21)-Cu(3)-Cu(2) | 111.35(15) |
| C(44)-H(44B)      | 0.9800     | Cu(1)-Cu(3)-Cu(2) | 61.15(3)   |
| C(44)-H(44C)      | 0.9800     | C(1)-N(1)-C(2)    | 109.9(6)   |
| C(46)-C(47)       | 1.343(9)   | C(1)-N(1)-B(1)    | 128.8(5)   |
| C(46)-H(46)       | 0.9500     | C(2)-N(1)-B(1)    | 121.3(5)   |
| C(47)-H(47)       | 0.9500     | C(1)-N(2)-C(3)    | 110.3(6)   |
| C(48)-H(48A)      | 0.9800     | C(1)-N(2)-C(4)    | 126.2(5)   |
| C(48)-H(48B)      | 0.9800     | C(3)-N(2)-C(4)    | 123.4(6)   |
| C(48)-H(48C)      | 0.9800     | C(5)-N(3)-C(6)    | 110.1(5)   |
| P(1)-F(6)         | 1.525(6)   | C(5)-N(3)-B(1)    | 127.7(5)   |
| P(1)-F(4)         | 1.563(6)   | C(6)-N(3)-B(1)    | 122.2(6)   |
| P(1)-F(3)         | 1.565(6)   | C(5)-N(4)-C(7)    | 111.2(6)   |
| P(1)-F(5)         | 1.587(5)   | C(5)-N(4)-C(8)    | 123.7(6)   |
| P(1)-F(1)         | 1.588(5)   | C(7)-N(4)-C(8)    | 124.9(6)   |
| P(1)-F(2)         | 1.588(4)   | C(9)-N(5)-C(10)   | 107.5(6)   |
| P(2)-F(11)        | 1.401(9)   | C(9)-N(5)-B(1)    | 129.4(5)   |
| P(2)-F(10)        | 1.470(7)   | C(10)-N(5)-B(1)   | 123.0(6)   |
| P(2)-F(8)         | 1.493(7)   | C(11)-N(6)-C(9)   | 110.5(6)   |
| P(2)-F(12)        | 1.511(9)   | C(11)-N(6)-C(12)  | 125.6(6)   |
| P(2)-F(9)         | 1.539(8)   | C(9)-N(6)-C(12)   | 123.9(5)   |
| P(2)-F(7)         | 1.583(8)   | C(13)-N(7)-C(14)  | 109.4(5)   |
|                   |            | C(13)-N(7)-B(2)   | 128.9(4)   |
| C(13)-Cu(1)-C(1)  | 171.1(2)   | C(14)-N(7)-B(2)   | 121.6(5)   |
| C(13)-Cu(1)-Cu(3) | 110.66(15) | C(13)-N(8)-C(15)  | 110.8(5)   |
| C(1)-Cu(1)-Cu(3)  | 77.68(16)  | C(13)-N(8)-C(16)  | 124.5(5)   |
| C(13)-Cu(1)-Cu(2) | 77.32(16)  | C(15)-N(8)-C(16)  | 124.7(5)   |
| C(1)-Cu(1)-Cu(2)  | 110.25(18) | C(17)-N(9)-C(18)  | 109.4(5)   |
| Cu(3)-Cu(1)-Cu(2) | 60.82(2)   | C(17)-N(9)-B(2)   | 127.6(4)   |
| C(5)-Cu(2)-C(17)  | 168.0(3)   | C(18)-N(9)-B(2)   | 123.0(5)   |



|                   |          |                     |          |
|-------------------|----------|---------------------|----------|
| C(17)-N(10)-C(19) | 110.8(6) | N(4)-C(5)-Cu(2)     | 125.4(5) |
| C(17)-N(10)-C(20) | 125.1(6) | C(7)-C(6)-N(3)      | 107.8(6) |
| C(19)-N(10)-C(20) | 124.1(6) | C(7)-C(6)-H(6)      | 126.1    |
| C(21)-N(11)-C(22) | 109.1(5) | N(3)-C(6)-H(6)      | 126.1    |
| C(21)-N(11)-B(2)  | 128.6(4) | C(6)-C(7)-N(4)      | 106.3(6) |
| C(22)-N(11)-B(2)  | 122.3(5) | C(6)-C(7)-H(7)      | 126.8    |
| C(21)-N(12)-C(23) | 111.1(5) | N(4)-C(7)-H(7)      | 126.9    |
| C(21)-N(12)-C(24) | 124.2(5) | N(4)-C(8)-H(8A)     | 109.4    |
| C(23)-N(12)-C(24) | 124.7(5) | N(4)-C(8)-H(8B)     | 109.5    |
| N(1)-B(1)-N(5)    | 111.6(5) | H(8A)-C(8)-H(8B)    | 109.5    |
| N(1)-B(1)-N(3)    | 111.7(6) | N(4)-C(8)-H(8C)     | 109.4    |
| N(5)-B(1)-N(3)    | 110.3(6) | H(8A)-C(8)-H(8C)    | 109.5    |
| N(1)-B(1)-H(1)    | 107.6    | H(8B)-C(8)-H(8C)    | 109.5    |
| N(5)-B(1)-H(1)    | 107.6    | N(5)-C(9)-N(6)      | 105.4(5) |
| N(3)-B(1)-H(1)    | 107.7    | N(5)-C(9)-Cu(3)     | 129.5(4) |
| N(11)-B(2)-N(7)   | 111.3(5) | N(6)-C(9)-Cu(3)     | 124.8(4) |
| N(11)-B(2)-N(9)   | 112.8(4) | C(11)-C(10)-N(5)    | 109.3(6) |
| N(7)-B(2)-N(9)    | 111.0(5) | C(11)-C(10)-H(10)   | 125.3    |
| N(11)-B(2)-H(2)   | 107.2    | N(5)-C(10)-H(10)    | 125.4    |
| N(7)-B(2)-H(2)    | 107.1    | C(10)-C(11)-N(6)    | 107.2(6) |
| N(9)-B(2)-H(2)    | 107.1    | C(10)-C(11)-H(11)   | 126.4    |
| N(1)-C(1)-N(2)    | 105.6(5) | N(6)-C(11)-H(11)    | 126.4    |
| N(1)-C(1)-Cu(1)   | 129.8(4) | N(6)-C(12)-H(12A)   | 109.4    |
| N(2)-C(1)-Cu(1)   | 124.5(4) | N(6)-C(12)-H(12B)   | 109.4    |
| C(3)-C(2)-N(1)    | 106.7(6) | H(12A)-C(12)-H(12B) | 109.5    |
| C(3)-C(2)-H(2A)   | 126.7    | N(6)-C(12)-H(12C)   | 109.5    |
| N(1)-C(2)-H(2A)   | 126.6    | H(12A)-C(12)-H(12C) | 109.5    |
| C(2)-C(3)-N(2)    | 107.5(6) | H(12B)-C(12)-H(12C) | 109.5    |
| C(2)-C(3)-H(3)    | 126.3    | N(8)-C(13)-N(7)     | 105.2(4) |
| N(2)-C(3)-H(3)    | 126.2    | N(8)-C(13)-Cu(1)    | 123.7(4) |
| N(2)-C(4)-H(4A)   | 109.5    | N(7)-C(13)-Cu(1)    | 131.1(4) |
| N(2)-C(4)-H(4B)   | 109.5    | C(15)-C(14)-N(7)    | 108.3(5) |
| H(4A)-C(4)-H(4B)  | 109.5    | C(15)-C(14)-H(14)   | 125.9    |
| N(2)-C(4)-H(4C)   | 109.5    | N(7)-C(14)-H(14)    | 125.9    |
| H(4A)-C(4)-H(4C)  | 109.5    | C(14)-C(15)-N(8)    | 106.4(5) |
| H(4B)-C(4)-H(4C)  | 109.5    | C(14)-C(15)-H(15)   | 126.8    |
| N(3)-C(5)-N(4)    | 104.6(5) | N(8)-C(15)-H(15)    | 126.8    |
| N(3)-C(5)-Cu(2)   | 129.8(4) | N(8)-C(16)-H(16A)   | 109.5    |

|                     |            |                   |            |
|---------------------|------------|-------------------|------------|
| N(8)-C(16)-H(16B)   | 109.5      | C(37)-Cu(4)-Cu(5) | 73.95(14)  |
| H(16A)-C(16)-H(16B) | 109.5      | C(25)-Cu(4)-Cu(5) | 111.44(16) |
| N(8)-C(16)-H(16C)   | 109.5      | Cu(6)-Cu(4)-Cu(5) | 61.51(2)   |
| H(16A)-C(16)-H(16C) | 109.5      | C(29)-Cu(5)-C(41) | 170.4(2)   |
| H(16B)-C(16)-H(16C) | 109.5      | C(29)-Cu(5)-Cu(6) | 110.42(15) |
| N(9)-C(17)-N(10)    | 105.2(5)   | C(41)-Cu(5)-Cu(6) | 77.46(16)  |
| N(9)-C(17)-Cu(2)    | 131.9(4)   | C(29)-Cu(5)-Cu(4) | 78.21(14)  |
| N(10)-C(17)-Cu(2)   | 122.9(5)   | C(41)-Cu(5)-Cu(4) | 111.13(15) |
| C(19)-C(18)-N(9)    | 108.6(6)   | Cu(6)-Cu(5)-Cu(4) | 56.79(2)   |
| C(19)-C(18)-H(18)   | 125.7      | C(45)-Cu(6)-C(33) | 171.5(2)   |
| N(9)-C(18)-H(18)    | 125.7      | C(45)-Cu(6)-Cu(4) | 77.67(17)  |
| C(18)-C(19)-N(10)   | 106.0(5)   | C(33)-Cu(6)-Cu(4) | 110.49(16) |
| C(18)-C(19)-H(19)   | 127.0      | C(45)-Cu(6)-Cu(5) | 111.57(17) |
| N(10)-C(19)-H(19)   | 127.0      | C(33)-Cu(6)-Cu(5) | 75.29(16)  |
| N(10)-C(20)-H(20A)  | 109.5      | Cu(4)-Cu(6)-Cu(5) | 61.70(2)   |
| N(10)-C(20)-H(20B)  | 109.4      | C(25)-N(13)-C(26) | 109.3(5)   |
| H(20A)-C(20)-H(20B) | 109.5      | C(25)-N(13)-B(3)  | 128.6(4)   |
| N(10)-C(20)-H(20C)  | 109.5      | C(26)-N(13)-B(3)  | 122.1(5)   |
| H(20A)-C(20)-H(20C) | 109.5      | C(25)-N(14)-C(27) | 110.5(5)   |
| H(20B)-C(20)-H(20C) | 109.5      | C(25)-N(14)-C(28) | 124.5(5)   |
| N(11)-C(21)-N(12)   | 105.3(4)   | C(27)-N(14)-C(28) | 124.6(5)   |
| N(11)-C(21)-Cu(3)   | 130.3(4)   | C(29)-N(15)-C(30) | 109.9(4)   |
| N(12)-C(21)-Cu(3)   | 124.3(4)   | C(29)-N(15)-B(3)  | 129.5(4)   |
| C(23)-C(22)-N(11)   | 108.0(5)   | C(30)-N(15)-B(3)  | 120.5(4)   |
| C(23)-C(22)-H(22)   | 126.0      | C(29)-N(16)-C(31) | 111.7(4)   |
| N(11)-C(22)-H(22)   | 126.0      | C(29)-N(16)-C(32) | 124.5(5)   |
| C(22)-C(23)-N(12)   | 106.5(5)   | C(31)-N(16)-C(32) | 123.7(5)   |
| C(22)-C(23)-H(23)   | 126.8      | C(33)-N(17)-C(34) | 108.8(5)   |
| N(12)-C(23)-H(23)   | 126.8      | C(33)-N(17)-B(3)  | 129.3(4)   |
| N(12)-C(24)-H(24A)  | 109.5      | C(34)-N(17)-B(3)  | 121.9(5)   |
| N(12)-C(24)-H(24B)  | 109.5      | C(33)-N(18)-C(35) | 110.5(5)   |
| H(24A)-C(24)-H(24B) | 109.5      | C(33)-N(18)-C(36) | 124.4(5)   |
| N(12)-C(24)-H(24C)  | 109.5      | C(35)-N(18)-C(36) | 124.9(5)   |
| H(24A)-C(24)-H(24C) | 109.5      | C(37)-N(19)-C(38) | 110.4(5)   |
| H(24B)-C(24)-H(24C) | 109.5      | C(37)-N(19)-B(4)  | 128.1(4)   |
| C(37)-Cu(4)-C(25)   | 171.7(2)   | C(38)-N(19)-B(4)  | 121.5(4)   |
| C(37)-Cu(4)-Cu(6)   | 108.52(15) | C(37)-N(20)-C(39) | 110.7(5)   |
| C(25)-Cu(4)-Cu(6)   | 79.77(17)  | C(37)-N(20)-C(40) | 125.0(5)   |

|                     |          |                     |          |
|---------------------|----------|---------------------|----------|
| C(39)-N(20)-C(40)   | 124.3(5) | H(28A)-C(28)-H(28C) | 109.5    |
| C(41)-N(21)-C(42)   | 109.6(5) | H(28B)-C(28)-H(28C) | 109.5    |
| C(41)-N(21)-B(4)    | 128.0(4) | N(16)-C(29)-N(15)   | 104.7(4) |
| C(42)-N(21)-B(4)    | 122.3(5) | N(16)-C(29)-Cu(5)   | 125.2(4) |
| C(41)-N(22)-C(43)   | 111.3(5) | N(15)-C(29)-Cu(5)   | 130.1(4) |
| C(41)-N(22)-C(44)   | 124.1(5) | C(31)-C(30)-N(15)   | 107.5(5) |
| C(43)-N(22)-C(44)   | 124.5(5) | C(31)-C(30)-H(30)   | 126.3    |
| C(45)-N(23)-C(46)   | 109.0(5) | N(15)-C(30)-H(30)   | 126.2    |
| C(45)-N(23)-B(4)    | 128.2(4) | C(30)-C(31)-N(16)   | 106.2(5) |
| C(46)-N(23)-B(4)    | 122.5(4) | C(30)-C(31)-H(31)   | 126.9    |
| C(45)-N(24)-C(47)   | 110.7(5) | N(16)-C(31)-H(31)   | 126.9    |
| C(45)-N(24)-C(48)   | 124.5(5) | N(16)-C(32)-H(32A)  | 109.5    |
| C(47)-N(24)-C(48)   | 124.8(6) | N(16)-C(32)-H(32B)  | 109.4    |
| N(13)-B(3)-N(15)    | 111.6(4) | H(32A)-C(32)-H(32B) | 109.5    |
| N(13)-B(3)-N(17)    | 111.1(5) | N(16)-C(32)-H(32C)  | 109.5    |
| N(15)-B(3)-N(17)    | 111.0(4) | H(32A)-C(32)-H(32C) | 109.5    |
| N(13)-B(3)-H(3A)    | 107.6    | H(32B)-C(32)-H(32C) | 109.5    |
| N(15)-B(3)-H(3A)    | 107.6    | N(17)-C(33)-N(18)   | 105.6(4) |
| N(17)-B(3)-H(3A)    | 107.6    | N(17)-C(33)-Cu(6)   | 130.8(4) |
| N(23)-B(4)-N(21)    | 111.6(4) | N(18)-C(33)-Cu(6)   | 123.6(4) |
| N(23)-B(4)-N(19)    | 110.6(4) | C(35)-C(34)-N(17)   | 108.4(5) |
| N(21)-B(4)-N(19)    | 110.4(4) | C(35)-C(34)-H(34)   | 125.8    |
| N(23)-B(4)-H(4)     | 108.0    | N(17)-C(34)-H(34)   | 125.8    |
| N(21)-B(4)-H(4)     | 108.1    | C(34)-C(35)-N(18)   | 106.7(5) |
| N(19)-B(4)-H(4)     | 108.0    | C(34)-C(35)-H(35)   | 126.7    |
| N(13)-C(25)-N(14)   | 105.7(4) | N(18)-C(35)-H(35)   | 126.7    |
| N(13)-C(25)-Cu(4)   | 130.6(4) | N(18)-C(36)-H(36A)  | 109.5    |
| N(14)-C(25)-Cu(4)   | 123.6(4) | N(18)-C(36)-H(36B)  | 109.5    |
| C(27)-C(26)-N(13)   | 108.2(5) | H(36A)-C(36)-H(36B) | 109.5    |
| C(27)-C(26)-H(26)   | 125.9    | N(18)-C(36)-H(36C)  | 109.5    |
| N(13)-C(26)-H(26)   | 125.9    | H(36A)-C(36)-H(36C) | 109.5    |
| C(26)-C(27)-N(14)   | 106.2(5) | H(36B)-C(36)-H(36C) | 109.5    |
| C(26)-C(27)-H(27)   | 126.9    | N(19)-C(37)-N(20)   | 105.0(4) |
| N(14)-C(27)-H(27)   | 126.9    | N(19)-C(37)-Cu(4)   | 132.5(4) |
| N(14)-C(28)-H(28A)  | 109.5    | N(20)-C(37)-Cu(4)   | 122.1(4) |
| N(14)-C(28)-H(28B)  | 109.5    | C(39)-C(38)-N(19)   | 107.8(5) |
| H(28A)-C(28)-H(28B) | 109.5    | C(39)-C(38)-H(38)   | 126.1    |
| N(14)-C(28)-H(28C)  | 109.4    | N(19)-C(38)-H(38)   | 126.1    |

|                     |          |                     |           |
|---------------------|----------|---------------------|-----------|
| C(38)-C(39)-N(20)   | 106.0(5) | H(48A)-C(48)-H(48B) | 109.5     |
| C(38)-C(39)-H(39)   | 127.0    | N(24)-C(48)-H(48C)  | 109.5     |
| N(20)-C(39)-H(39)   | 127.0    | H(48A)-C(48)-H(48C) | 109.5     |
| N(20)-C(40)-H(40A)  | 109.5    | H(48B)-C(48)-H(48C) | 109.5     |
| N(20)-C(40)-H(40B)  | 109.5    | F(6)-P(1)-F(4)      | 89.7(6)   |
| H(40A)-C(40)-H(40B) | 109.5    | F(6)-P(1)-F(3)      | 95.4(6)   |
| N(20)-C(40)-H(40C)  | 109.5    | F(4)-P(1)-F(3)      | 174.7(5)  |
| H(40A)-C(40)-H(40C) | 109.5    | F(6)-P(1)-F(5)      | 178.8(6)  |
| H(40B)-C(40)-H(40C) | 109.5    | F(4)-P(1)-F(5)      | 89.0(5)   |
| N(22)-C(41)-N(21)   | 104.8(4) | F(3)-P(1)-F(5)      | 85.8(4)   |
| N(22)-C(41)-Cu(5)   | 124.7(4) | F(6)-P(1)-F(1)      | 92.3(3)   |
| N(21)-C(41)-Cu(5)   | 129.9(4) | F(4)-P(1)-F(1)      | 90.0(4)   |
| C(43)-C(42)-N(21)   | 108.5(5) | F(3)-P(1)-F(1)      | 91.1(3)   |
| C(43)-C(42)-H(42)   | 125.7    | F(5)-P(1)-F(1)      | 88.0(3)   |
| N(21)-C(42)-H(42)   | 125.8    | F(6)-P(1)-F(2)      | 90.7(4)   |
| C(42)-C(43)-N(22)   | 105.8(5) | F(4)-P(1)-F(2)      | 89.3(4)   |
| C(42)-C(43)-H(43)   | 127.1    | F(3)-P(1)-F(2)      | 89.3(3)   |
| N(22)-C(43)-H(43)   | 127.1    | F(5)-P(1)-F(2)      | 89.1(3)   |
| N(22)-C(44)-H(44A)  | 109.4    | F(1)-P(1)-F(2)      | 177.0(3)  |
| N(22)-C(44)-H(44B)  | 109.5    | F(11)-P(2)-F(10)    | 97.2(11)  |
| H(44A)-C(44)-H(44B) | 109.5    | F(11)-P(2)-F(8)     | 91.1(10)  |
| N(22)-C(44)-H(44C)  | 109.5    | F(10)-P(2)-F(8)     | 93.4(6)   |
| H(44A)-C(44)-H(44C) | 109.5    | F(11)-P(2)-F(12)    | 160.3(13) |
| H(44B)-C(44)-H(44C) | 109.5    | F(10)-P(2)-F(12)    | 95.4(9)   |
| N(23)-C(45)-N(24)   | 105.5(5) | F(8)-P(2)-F(12)     | 103.2(9)  |
| N(23)-C(45)-Cu(6)   | 128.8(4) | F(11)-P(2)-F(9)     | 86.2(10)  |
| N(24)-C(45)-Cu(6)   | 125.6(4) | F(10)-P(2)-F(9)     | 176.4(10) |
| C(47)-C(46)-N(23)   | 108.5(5) | F(8)-P(2)-F(9)      | 85.2(7)   |
| C(47)-C(46)-H(46)   | 125.8    | F(12)-P(2)-F(9)     | 81.7(8)   |
| N(23)-C(46)-H(46)   | 125.7    | F(11)-P(2)-F(7)     | 87.8(10)  |
| C(46)-C(47)-N(24)   | 106.3(5) | F(10)-P(2)-F(7)     | 86.6(6)   |
| C(46)-C(47)-H(47)   | 126.8    | F(8)-P(2)-F(7)      | 178.9(8)  |
| N(24)-C(47)-H(47)   | 126.9    | F(12)-P(2)-F(7)     | 77.9(8)   |
| N(24)-C(48)-H(48A)  | 109.5    | F(9)-P(2)-F(7)      | 95.0(7)   |
| N(24)-C(48)-H(48B)  | 109.4    |                     |           |

---

Symmetry transformations used to generate equivalent atoms:

Table 4. Anisotropic displacement parameters ( $\text{\AA}^2 \times 10^3$ ) for ea03305b. The anisotropic displacement factor exponent takes the form:  $-2\pi^2 [ h^2 a^{*2} U^{11} + \dots + 2 h k a^* b^* U^{12} ]$

|       | U <sup>11</sup> | U <sup>22</sup> | U <sup>33</sup> | U <sup>23</sup> | U <sup>13</sup> | U <sup>12</sup> |
|-------|-----------------|-----------------|-----------------|-----------------|-----------------|-----------------|
| Cu(1) | 35(1)           | 33(1)           | 26(1)           | 1(1)            | -5(1)           | -15(1)          |
| Cu(2) | 30(1)           | 37(1)           | 31(1)           | 3(1)            | -8(1)           | -9(1)           |
| Cu(3) | 29(1)           | 25(1)           | 30(1)           | 7(1)            | -11(1)          | -11(1)          |
| N(1)  | 38(2)           | 54(3)           | 25(2)           | 7(2)            | -5(2)           | -20(2)          |
| N(2)  | 37(2)           | 44(3)           | 37(2)           | -11(2)          | -5(2)           | -14(2)          |
| N(3)  | 40(3)           | 59(3)           | 37(2)           | 19(2)           | -23(2)          | -19(2)          |
| N(4)  | 35(3)           | 62(4)           | 50(3)           | 12(3)           | -19(2)          | -16(2)          |
| N(5)  | 30(2)           | 38(3)           | 49(3)           | 22(2)           | -14(2)          | -13(2)          |
| N(6)  | 33(2)           | 28(2)           | 56(3)           | -2(2)           | -7(2)           | -9(2)           |
| N(7)  | 41(2)           | 36(2)           | 29(2)           | 5(2)            | -6(2)           | -24(2)          |
| N(8)  | 38(2)           | 36(2)           | 36(2)           | -2(2)           | -11(2)          | -21(2)          |
| N(9)  | 34(2)           | 41(2)           | 26(2)           | -4(2)           | -2(2)           | -21(2)          |
| N(10) | 34(2)           | 42(3)           | 45(3)           | -14(2)          | 4(2)            | -16(2)          |
| N(11) | 39(2)           | 31(2)           | 28(2)           | 9(2)            | -17(2)          | -16(2)          |
| N(12) | 33(2)           | 31(2)           | 41(2)           | 1(2)            | -18(2)          | -7(2)           |
| B(1)  | 41(3)           | 61(4)           | 32(3)           | 22(3)           | -15(3)          | -20(3)          |
| B(2)  | 43(3)           | 41(3)           | 24(2)           | 8(2)            | -12(2)          | -25(3)          |
| C(1)  | 34(3)           | 44(3)           | 27(2)           | 0(2)            | -9(2)           | -17(2)          |
| C(2)  | 48(4)           | 81(5)           | 27(3)           | 0(3)            | 1(2)            | -33(4)          |
| C(3)  | 38(3)           | 70(5)           | 36(3)           | -10(3)          | 4(2)            | -24(3)          |
| C(4)  | 54(4)           | 42(3)           | 55(4)           | -17(3)          | -14(3)          | -12(3)          |
| C(5)  | 35(3)           | 44(3)           | 39(3)           | 12(2)           | -18(2)          | -14(2)          |
| C(6)  | 57(4)           | 88(6)           | 40(3)           | 21(4)           | -28(3)          | -29(4)          |
| C(7)  | 59(4)           | 93(6)           | 54(4)           | 24(4)           | -39(4)          | -39(4)          |
| C(8)  | 37(3)           | 79(5)           | 65(5)           | 5(4)            | -12(3)          | -24(3)          |
| C(9)  | 27(2)           | 27(2)           | 40(3)           | 11(2)           | -9(2)           | -10(2)          |
| C(10) | 46(4)           | 42(4)           | 90(6)           | 42(4)           | -26(4)          | -12(3)          |
| C(11) | 41(3)           | 24(3)           | 97(6)           | 10(3)           | -12(4)          | -8(2)           |
| C(12) | 47(4)           | 46(4)           | 67(5)           | -15(3)          | -5(3)           | -20(3)          |
| C(13) | 31(2)           | 30(2)           | 31(2)           | -1(2)           | -9(2)           | -14(2)          |
| C(14) | 51(4)           | 57(4)           | 36(3)           | 4(3)            | -3(2)           | -38(3)          |
| C(15) | 48(3)           | 61(4)           | 42(3)           | 3(3)            | -7(3)           | -36(3)          |
| C(16) | 64(4)           | 56(4)           | 42(3)           | -1(3)           | -23(3)          | -32(3)          |

|       |       |       |       |        |        |        |
|-------|-------|-------|-------|--------|--------|--------|
| C(17) | 29(2) | 37(3) | 31(2) | -6(2)  | 1(2)   | -16(2) |
| C(18) | 40(3) | 61(4) | 26(2) | -13(2) | 0(2)   | -28(3) |
| C(19) | 40(3) | 72(5) | 46(3) | -28(3) | 3(3)   | -29(3) |
| C(20) | 45(4) | 38(3) | 78(5) | -9(3)  | 5(3)   | -5(3)  |
| C(21) | 29(2) | 27(2) | 27(2) | 4(2)   | -13(2) | -11(2) |
| C(22) | 59(4) | 33(3) | 40(3) | 16(2)  | -31(3) | -19(3) |
| C(23) | 56(4) | 31(3) | 56(4) | 5(3)   | -34(3) | -5(3)  |
| C(24) | 29(3) | 46(3) | 45(3) | -4(3)  | -10(2) | -6(2)  |
| Cu(4) | 26(1) | 29(1) | 30(1) | 9(1)   | -9(1)  | -9(1)  |
| Cu(5) | 29(1) | 30(1) | 23(1) | 1(1)   | -6(1)  | -11(1) |
| Cu(6) | 38(1) | 29(1) | 31(1) | -2(1)  | -15(1) | 0(1)   |
| N(13) | 34(2) | 32(2) | 33(2) | 11(2)  | -13(2) | -16(2) |
| N(14) | 44(3) | 42(3) | 47(3) | 14(2)  | -20(2) | -28(2) |
| N(15) | 29(2) | 31(2) | 25(2) | 3(2)   | -8(2)  | -10(2) |
| N(16) | 30(2) | 27(2) | 31(2) | -2(2)  | -12(2) | -5(2)  |
| N(17) | 33(2) | 26(2) | 33(2) | 4(2)   | -18(2) | -7(2)  |
| N(18) | 31(2) | 37(3) | 39(2) | 1(2)   | -8(2)  | -2(2)  |
| N(19) | 29(2) | 25(2) | 25(2) | 4(2)   | -10(2) | -7(2)  |
| N(20) | 28(2) | 29(2) | 31(2) | -2(2)  | -10(2) | 1(2)   |
| N(21) | 25(2) | 43(3) | 26(2) | -3(2)  | -3(2)  | -11(2) |
| N(22) | 27(2) | 46(3) | 34(2) | -1(2)  | -7(2)  | -12(2) |
| N(23) | 25(2) | 33(2) | 26(2) | -5(2)  | -7(2)  | -5(2)  |
| N(24) | 57(3) | 30(2) | 41(3) | -3(2)  | -21(2) | -8(2)  |
| B(3)  | 34(3) | 31(3) | 34(3) | 9(2)   | -15(2) | -12(2) |
| B(4)  | 31(3) | 34(3) | 22(2) | 1(2)   | -7(2)  | -9(2)  |
| C(25) | 32(2) | 35(3) | 31(2) | 9(2)   | -10(2) | -16(2) |
| C(26) | 57(4) | 45(3) | 53(4) | 27(3)  | -26(3) | -29(3) |
| C(27) | 61(4) | 48(4) | 63(4) | 28(3)  | -26(3) | -38(3) |
| C(28) | 50(4) | 68(5) | 59(4) | 17(3)  | -28(3) | -34(4) |
| C(29) | 25(2) | 26(2) | 28(2) | 2(2)   | -9(2)  | -7(2)  |
| C(30) | 33(3) | 40(3) | 25(2) | 0(2)   | -7(2)  | -7(2)  |
| C(31) | 32(3) | 40(3) | 33(3) | -5(2)  | -9(2)  | -5(2)  |
| C(32) | 47(3) | 26(3) | 48(3) | 1(2)   | -13(3) | -8(2)  |
| C(33) | 30(2) | 28(2) | 34(2) | 2(2)   | -12(2) | -5(2)  |
| C(34) | 37(3) | 41(3) | 41(3) | 3(2)   | -25(2) | -4(2)  |
| C(35) | 37(3) | 47(3) | 54(4) | 8(3)   | -28(3) | -8(3)  |
| C(36) | 38(3) | 65(5) | 49(4) | 1(3)   | 0(3)   | 9(3)   |
| C(37) | 22(2) | 30(2) | 29(2) | 1(2)   | -10(2) | -8(2)  |

|       |         |         |         |          |          |          |
|-------|---------|---------|---------|----------|----------|----------|
| C(38) | 45(3)   | 27(3)   | 41(3)   | 14(2)    | -16(2)   | -12(2)   |
| C(39) | 48(3)   | 23(2)   | 49(3)   | 3(2)     | -22(3)   | -5(2)    |
| C(40) | 33(3)   | 52(4)   | 36(3)   | -7(3)    | -5(2)    | 0(2)     |
| C(41) | 28(2)   | 36(3)   | 25(2)   | 1(2)     | -9(2)    | -11(2)   |
| C(42) | 32(3)   | 65(4)   | 28(3)   | -5(3)    | 1(2)     | -16(3)   |
| C(43) | 30(3)   | 74(5)   | 32(3)   | -5(3)    | -3(2)    | -17(3)   |
| C(44) | 42(3)   | 66(4)   | 45(3)   | 3(3)     | -21(3)   | -23(3)   |
| C(45) | 38(3)   | 29(2)   | 31(2)   | -5(2)    | -10(2)   | -2(2)    |
| C(46) | 34(3)   | 42(3)   | 29(2)   | -4(2)    | -12(2)   | -8(2)    |
| C(47) | 54(4)   | 41(3)   | 47(3)   | -9(3)    | -22(3)   | -13(3)   |
| C(48) | 100(7)  | 31(3)   | 63(5)   | 3(3)     | -36(5)   | -21(4)   |
| P(1)  | 37(1)   | 45(1)   | 32(1)   | -4(1)    | -7(1)    | -7(1)    |
| F(1)  | 78(3)   | 62(3)   | 47(2)   | -15(2)   | -7(2)    | 5(2)     |
| F(2)  | 82(3)   | 84(3)   | 40(2)   | -21(2)   | -8(2)    | -16(3)   |
| F(3)  | 85(4)   | 156(7)  | 105(5)  | -47(5)   | 20(4)    | -78(5)   |
| F(4)  | 61(4)   | 252(11) | 101(5)  | -50(6)   | -5(3)    | -72(5)   |
| F(5)  | 125(5)  | 68(3)   | 54(3)   | 5(2)     | -19(3)   | 6(3)     |
| F(6)  | 275(12) | 70(4)   | 77(4)   | 16(3)    | -39(6)   | 58(6)    |
| P(2)  | 39(1)   | 38(1)   | 31(1)   | -2(1)    | -6(1)    | -8(1)    |
| F(7)  | 102(7)  | 274(14) | 183(10) | -76(10)  | -11(6)   | -95(8)   |
| F(8)  | 79(5)   | 276(13) | 254(12) | -119(11) | -19(6)   | -89(7)   |
| F(9)  | 284(15) | 156(9)  | 191(11) | -122(8)  | 132(10)  | -126(10) |
| F(10) | 164(9)  | 220(11) | 297(14) | -212(11) | 144(9)   | -119(8)  |
| F(11) | 580(40) | 165(12) | 310(20) | 159(13)  | -300(20) | -119(17) |
| F(12) | 335(19) | 165(10) | 197(12) | 107(10)  | -39(12)  | -126(12) |

---

Table 5. Hydrogen coordinates ( $\times 10^4$ ) and isotropic displacement parameters ( $\text{\AA}^2 \times 10^{-3}$ ) for ea03305b.

|        | x     | y    | z    | U(eq) |
|--------|-------|------|------|-------|
| H(1)   | 6437  | 5879 | 6725 | 52    |
| H(2)   | 7328  | 8291 | 2103 | 39    |
| H(2A)  | 4629  | 6792 | 7257 | 61    |
| H(3)   | 3532  | 8311 | 7016 | 57    |
| H(4A)  | 4604  | 9749 | 6015 | 74    |
| H(4B)  | 3613  | 9499 | 5912 | 74    |
| H(4C)  | 4588  | 9329 | 5173 | 74    |
| H(6)   | 7782  | 6461 | 7174 | 69    |
| H(7)   | 9443  | 6699 | 6516 | 73    |
| H(8A)  | 10387 | 6030 | 4704 | 88    |
| H(8B)  | 10254 | 7049 | 4995 | 88    |
| H(8C)  | 9720  | 6881 | 4304 | 88    |
| H(10)  | 6945  | 4251 | 6088 | 71    |
| H(11)  | 6790  | 3554 | 4889 | 66    |
| H(12A) | 6226  | 5274 | 3339 | 79    |
| H(12B) | 5408  | 4754 | 3781 | 79    |
| H(12C) | 6556  | 4188 | 3438 | 79    |
| H(14)  | 8841  | 8782 | 2263 | 53    |
| H(15)  | 9451  | 9274 | 3371 | 56    |
| H(16A) | 8063  | 9685 | 5084 | 73    |
| H(16B) | 9091  | 8883 | 4977 | 73    |
| H(16C) | 8033  | 8669 | 5365 | 73    |
| H(18)  | 7755  | 6815 | 1292 | 48    |
| H(19)  | 8518  | 5176 | 1458 | 61    |
| H(20A) | 8608  | 4715 | 3621 | 87    |
| H(20B) | 9502  | 4477 | 2819 | 87    |
| H(20C) | 8486  | 4184 | 2876 | 87    |
| H(22)  | 5594  | 9409 | 2283 | 48    |
| H(23)  | 3870  | 9543 | 3099 | 55    |
| H(24A) | 3934  | 7856 | 4755 | 61    |
| H(24B) | 3336  | 7908 | 4053 | 61    |
| H(24C) | 3223  | 8813 | 4547 | 61    |



|        |      |       |       |    |
|--------|------|-------|-------|----|
| H(3A)  | 2522 | 7106  | 3189  | 38 |
| H(4)   | 2980 | 9235  | -1553 | 35 |
| H(26)  | 1725 | 5857  | 2979  | 57 |
| H(27)  | 557  | 5628  | 2179  | 62 |
| H(28A) | -462 | 7319  | 1199  | 80 |
| H(28B) | 125  | 6329  | 806   | 80 |
| H(28C) | 506  | 7201  | 458   | 80 |
| H(30)  | 1358 | 8550  | 3897  | 40 |
| H(31)  | 1043 | 10229 | 3682  | 43 |
| H(32A) | 2510 | 10953 | 2342  | 61 |
| H(32B) | 1334 | 11199 | 2351  | 61 |
| H(32C) | 2155 | 10699 | 1574  | 61 |
| H(34)  | 4415 | 6697  | 3074  | 46 |
| H(35)  | 5979 | 6291  | 2010  | 53 |
| H(36A) | 5772 | 5831  | 219   | 86 |
| H(36B) | 6409 | 6465  | 439   | 86 |
| H(36C) | 5499 | 6894  | 3     | 86 |
| H(38)  | 2106 | 10868 | -991  | 44 |
| H(39)  | 708  | 11603 | 158   | 47 |
| H(40A) | -503 | 10217 | 1265  | 64 |
| H(40B) | -140 | 11042 | 1527  | 64 |
| H(40C) | 335  | 10020 | 1791  | 64 |
| H(42)  | 4934 | 8619  | -1900 | 51 |
| H(43)  | 6298 | 8476  | -1177 | 55 |
| H(44A) | 5766 | 9356  | 532   | 72 |
| H(44B) | 6306 | 8284  | 416   | 72 |
| H(44C) | 5240 | 8635  | 1047  | 72 |
| H(46)  | 2007 | 8254  | -2034 | 42 |
| H(47)  | 1687 | 6743  | -1734 | 54 |
| H(48A) | 2858 | 5350  | -775  | 92 |
| H(48B) | 1706 | 5752  | -305  | 92 |
| H(48C) | 2594 | 5800  | 112   | 92 |

---

Table 6. Torsion angles [°] for ea03305b.

---

|                         |             |
|-------------------------|-------------|
| C(13)-Cu(1)-Cu(2)-C(5)  | 112.4(2)    |
| C(1)-Cu(1)-Cu(2)-C(5)   | -62.8(2)    |
| Cu(3)-Cu(1)-Cu(2)-C(5)  | -124.98(18) |
| C(13)-Cu(1)-Cu(2)-C(17) | -60.8(2)    |
| C(1)-Cu(1)-Cu(2)-C(17)  | 124.1(2)    |
| Cu(3)-Cu(1)-Cu(2)-C(17) | 61.86(16)   |
| C(13)-Cu(1)-Cu(2)-Cu(3) | -122.67(16) |
| C(1)-Cu(1)-Cu(2)-Cu(3)  | 62.20(17)   |
| C(13)-Cu(1)-Cu(3)-C(9)  | 119.9(2)    |
| C(1)-Cu(1)-Cu(3)-C(9)   | -63.3(3)    |
| Cu(2)-Cu(1)-Cu(3)-C(9)  | 58.50(18)   |
| C(13)-Cu(1)-Cu(3)-C(21) | -61.0(2)    |
| C(1)-Cu(1)-Cu(3)-C(21)  | 115.8(2)    |
| Cu(2)-Cu(1)-Cu(3)-C(21) | -122.34(16) |
| C(13)-Cu(1)-Cu(3)-Cu(2) | 61.37(17)   |
| C(1)-Cu(1)-Cu(3)-Cu(2)  | -121.84(18) |
| C(5)-Cu(2)-Cu(3)-C(9)   | -64.6(3)    |
| C(17)-Cu(2)-Cu(3)-C(9)  | 112.0(3)    |
| Cu(1)-Cu(2)-Cu(3)-C(9)  | -124.74(19) |
| C(5)-Cu(2)-Cu(3)-C(21)  | 123.0(3)    |
| C(17)-Cu(2)-Cu(3)-C(21) | -60.5(2)    |
| Cu(1)-Cu(2)-Cu(3)-C(21) | 62.78(16)   |
| C(5)-Cu(2)-Cu(3)-Cu(1)  | 60.2(2)     |
| C(17)-Cu(2)-Cu(3)-Cu(1) | -123.25(17) |
| C(1)-N(1)-B(1)-N(5)     | -81.3(7)    |
| C(2)-N(1)-B(1)-N(5)     | 96.3(6)     |
| C(1)-N(1)-B(1)-N(3)     | 42.8(8)     |
| C(2)-N(1)-B(1)-N(3)     | -139.7(6)   |
| C(9)-N(5)-B(1)-N(1)     | 37.4(8)     |
| C(10)-N(5)-B(1)-N(1)    | -145.1(6)   |
| C(9)-N(5)-B(1)-N(3)     | -87.5(7)    |
| C(10)-N(5)-B(1)-N(3)    | 90.0(7)     |
| C(5)-N(3)-B(1)-N(1)     | -87.8(8)    |
| C(6)-N(3)-B(1)-N(1)     | 90.8(7)     |
| C(5)-N(3)-B(1)-N(5)     | 37.0(9)     |
| C(6)-N(3)-B(1)-N(5)     | -144.4(7)   |

|                       |            |
|-----------------------|------------|
| C(21)-N(11)-B(2)-N(7) | -80.0(7)   |
| C(22)-N(11)-B(2)-N(7) | 96.7(6)    |
| C(21)-N(11)-B(2)-N(9) | 45.5(7)    |
| C(22)-N(11)-B(2)-N(9) | -137.8(5)  |
| C(13)-N(7)-B(2)-N(11) | 41.4(8)    |
| C(14)-N(7)-B(2)-N(11) | -141.1(6)  |
| C(13)-N(7)-B(2)-N(9)  | -85.1(7)   |
| C(14)-N(7)-B(2)-N(9)  | 92.4(6)    |
| C(17)-N(9)-B(2)-N(11) | -84.6(6)   |
| C(18)-N(9)-B(2)-N(11) | 99.0(6)    |
| C(17)-N(9)-B(2)-N(7)  | 41.1(7)    |
| C(18)-N(9)-B(2)-N(7)  | -135.3(5)  |
| C(2)-N(1)-C(1)-N(2)   | -0.6(6)    |
| B(1)-N(1)-C(1)-N(2)   | 177.1(6)   |
| C(2)-N(1)-C(1)-Cu(1)  | -178.6(4)  |
| B(1)-N(1)-C(1)-Cu(1)  | -0.8(9)    |
| C(3)-N(2)-C(1)-N(1)   | 0.2(6)     |
| C(4)-N(2)-C(1)-N(1)   | 176.5(5)   |
| C(3)-N(2)-C(1)-Cu(1)  | 178.3(4)   |
| C(4)-N(2)-C(1)-Cu(1)  | -5.4(8)    |
| Cu(3)-Cu(1)-C(1)-N(1) | 72.7(5)    |
| Cu(2)-Cu(1)-C(1)-N(1) | 20.5(5)    |
| Cu(3)-Cu(1)-C(1)-N(2) | -104.9(5)  |
| Cu(2)-Cu(1)-C(1)-N(2) | -157.2(4)  |
| C(1)-N(1)-C(2)-C(3)   | 0.8(7)     |
| B(1)-N(1)-C(2)-C(3)   | -177.2(6)  |
| N(1)-C(2)-C(3)-N(2)   | -0.6(7)    |
| C(1)-N(2)-C(3)-C(2)   | 0.2(7)     |
| C(4)-N(2)-C(3)-C(2)   | -176.1(6)  |
| C(6)-N(3)-C(5)-N(4)   | 1.2(8)     |
| B(1)-N(3)-C(5)-N(4)   | 179.9(6)   |
| C(6)-N(3)-C(5)-Cu(2)  | -174.2(6)  |
| B(1)-N(3)-C(5)-Cu(2)  | 4.5(10)    |
| C(7)-N(4)-C(5)-N(3)   | -0.4(8)    |
| C(8)-N(4)-C(5)-N(3)   | 174.2(7)   |
| C(7)-N(4)-C(5)-Cu(2)  | 175.2(6)   |
| C(8)-N(4)-C(5)-Cu(2)  | -10.2(10)  |
| C(17)-Cu(2)-C(5)-N(3) | -144.3(10) |

|                        |           |
|------------------------|-----------|
| Cu(3)-Cu(2)-C(5)-N(3)  | 19.4(7)   |
| Cu(1)-Cu(2)-C(5)-N(3)  | 68.0(6)   |
| C(17)-Cu(2)-C(5)-N(4)  | 41.2(15)  |
| Cu(3)-Cu(2)-C(5)-N(4)  | -155.2(5) |
| Cu(1)-Cu(2)-C(5)-N(4)  | -106.6(6) |
| C(5)-N(3)-C(6)-C(7)    | -1.5(10)  |
| B(1)-N(3)-C(6)-C(7)    | 179.6(7)  |
| N(3)-C(6)-C(7)-N(4)    | 1.2(10)   |
| C(5)-N(4)-C(7)-C(6)    | -0.5(10)  |
| C(8)-N(4)-C(7)-C(6)    | -175.0(8) |
| C(10)-N(5)-C(9)-N(6)   | 0.5(6)    |
| B(1)-N(5)-C(9)-N(6)    | 178.3(5)  |
| C(10)-N(5)-C(9)-Cu(3)  | -173.5(5) |
| B(1)-N(5)-C(9)-Cu(3)   | 4.3(9)    |
| C(11)-N(6)-C(9)-N(5)   | -0.8(6)   |
| C(12)-N(6)-C(9)-N(5)   | 177.9(5)  |
| C(11)-N(6)-C(9)-Cu(3)  | 173.5(4)  |
| C(12)-N(6)-C(9)-Cu(3)  | -7.8(8)   |
| Cu(1)-Cu(3)-C(9)-N(5)  | 19.2(5)   |
| Cu(2)-Cu(3)-C(9)-N(5)  | 69.8(5)   |
| Cu(1)-Cu(3)-C(9)-N(6)  | -153.6(4) |
| Cu(2)-Cu(3)-C(9)-N(6)  | -103.1(5) |
| C(9)-N(5)-C(10)-C(11)  | 0.0(8)    |
| B(1)-N(5)-C(10)-C(11)  | -177.9(6) |
| N(5)-C(10)-C(11)-N(6)  | -0.5(8)   |
| C(9)-N(6)-C(11)-C(10)  | 0.8(8)    |
| C(12)-N(6)-C(11)-C(10) | -177.9(6) |
| C(15)-N(8)-C(13)-N(7)  | 0.2(7)    |
| C(16)-N(8)-C(13)-N(7)  | 178.1(6)  |
| C(15)-N(8)-C(13)-Cu(1) | 177.3(5)  |
| C(16)-N(8)-C(13)-Cu(1) | -4.8(8)   |
| C(14)-N(7)-C(13)-N(8)  | 0.0(7)    |
| B(2)-N(7)-C(13)-N(8)   | 177.8(6)  |
| C(14)-N(7)-C(13)-Cu(1) | -176.8(5) |
| B(2)-N(7)-C(13)-Cu(1)  | 0.9(9)    |
| Cu(3)-Cu(1)-C(13)-N(8) | -157.9(4) |
| Cu(2)-Cu(1)-C(13)-N(8) | -106.1(5) |
| Cu(3)-Cu(1)-C(13)-N(7) | 18.4(6)   |

|                         |            |
|-------------------------|------------|
| Cu(2)-Cu(1)-C(13)-N(7)  | 70.2(5)    |
| C(13)-N(7)-C(14)-C(15)  | -0.3(8)    |
| B(2)-N(7)-C(14)-C(15)   | -178.2(6)  |
| N(7)-C(14)-C(15)-N(8)   | 0.4(8)     |
| C(13)-N(8)-C(15)-C(14)  | -0.4(8)    |
| C(16)-N(8)-C(15)-C(14)  | -178.3(7)  |
| C(18)-N(9)-C(17)-N(10)  | -1.5(6)    |
| B(2)-N(9)-C(17)-N(10)   | -178.2(5)  |
| C(18)-N(9)-C(17)-Cu(2)  | 177.9(4)   |
| B(2)-N(9)-C(17)-Cu(2)   | 1.1(8)     |
| C(19)-N(10)-C(17)-N(9)  | 1.5(6)     |
| C(20)-N(10)-C(17)-N(9)  | 178.3(6)   |
| C(19)-N(10)-C(17)-Cu(2) | -177.9(4)  |
| C(20)-N(10)-C(17)-Cu(2) | -1.2(8)    |
| C(5)-Cu(2)-C(17)-N(9)   | -127.4(11) |
| Cu(3)-Cu(2)-C(17)-N(9)  | 68.0(5)    |
| Cu(1)-Cu(2)-C(17)-N(9)  | 18.5(5)    |
| C(5)-Cu(2)-C(17)-N(10)  | 51.9(14)   |
| Cu(3)-Cu(2)-C(17)-N(10) | -112.7(4)  |
| Cu(1)-Cu(2)-C(17)-N(10) | -162.2(4)  |
| C(17)-N(9)-C(18)-C(19)  | 1.0(6)     |
| B(2)-N(9)-C(18)-C(19)   | 177.9(5)   |
| N(9)-C(18)-C(19)-N(10)  | 0.0(7)     |
| C(17)-N(10)-C(19)-C(18) | -1.0(7)    |
| C(20)-N(10)-C(19)-C(18) | -177.7(6)  |
| C(22)-N(11)-C(21)-N(12) | -0.2(6)    |
| B(2)-N(11)-C(21)-N(12)  | 176.9(5)   |
| C(22)-N(11)-C(21)-Cu(3) | 178.4(4)   |
| B(2)-N(11)-C(21)-Cu(3)  | -4.5(8)    |
| C(23)-N(12)-C(21)-N(11) | 0.5(6)     |
| C(24)-N(12)-C(21)-N(11) | 178.3(5)   |
| C(23)-N(12)-C(21)-Cu(3) | -178.2(4)  |
| C(24)-N(12)-C(21)-Cu(3) | -0.4(7)    |
| Cu(1)-Cu(3)-C(21)-N(11) | 74.3(5)    |
| Cu(2)-Cu(3)-C(21)-N(11) | 21.7(5)    |
| Cu(1)-Cu(3)-C(21)-N(12) | -107.3(4)  |
| Cu(2)-Cu(3)-C(21)-N(12) | -159.9(4)  |
| C(21)-N(11)-C(22)-C(23) | -0.2(7)    |

|                         |             |
|-------------------------|-------------|
| B(2)-N(11)-C(22)-C(23)  | -177.5(5)   |
| N(11)-C(22)-C(23)-N(12) | 0.6(7)      |
| C(21)-N(12)-C(23)-C(22) | -0.7(7)     |
| C(24)-N(12)-C(23)-C(22) | -178.4(5)   |
| C(37)-Cu(4)-Cu(5)-C(29) | 113.6(2)    |
| C(25)-Cu(4)-Cu(5)-C(29) | -59.7(2)    |
| Cu(6)-Cu(4)-Cu(5)-C(29) | -124.23(15) |
| C(37)-Cu(4)-Cu(5)-C(41) | -64.2(2)    |
| C(25)-Cu(4)-Cu(5)-C(41) | 122.4(3)    |
| Cu(6)-Cu(4)-Cu(5)-C(41) | 57.92(18)   |
| C(37)-Cu(4)-Cu(5)-Cu(6) | -122.16(16) |
| C(25)-Cu(4)-Cu(5)-Cu(6) | 64.52(19)   |
| C(37)-Cu(4)-Cu(6)-C(45) | -63.9(2)    |
| C(25)-Cu(4)-Cu(6)-C(45) | 115.6(2)    |
| Cu(5)-Cu(4)-Cu(6)-C(45) | -123.03(18) |
| C(37)-Cu(4)-Cu(6)-C(33) | 118.5(2)    |
| C(25)-Cu(4)-Cu(6)-C(33) | -62.0(2)    |
| Cu(5)-Cu(4)-Cu(6)-C(33) | 59.40(17)   |
| C(37)-Cu(4)-Cu(6)-Cu(5) | 59.10(15)   |
| C(25)-Cu(4)-Cu(6)-Cu(5) | -121.37(16) |
| C(29)-Cu(5)-Cu(6)-C(45) | 121.5(2)    |
| C(41)-Cu(5)-Cu(6)-C(45) | -64.2(2)    |
| Cu(4)-Cu(5)-Cu(6)-C(45) | 61.73(19)   |
| C(29)-Cu(5)-Cu(6)-C(33) | -63.8(2)    |
| C(41)-Cu(5)-Cu(6)-C(33) | 110.5(2)    |
| Cu(4)-Cu(5)-Cu(6)-C(33) | -123.53(17) |
| C(29)-Cu(5)-Cu(6)-Cu(4) | 59.72(15)   |
| C(41)-Cu(5)-Cu(6)-Cu(4) | -125.94(16) |
| C(25)-N(13)-B(3)-N(15)  | 42.3(8)     |
| C(26)-N(13)-B(3)-N(15)  | -139.5(6)   |
| C(25)-N(13)-B(3)-N(17)  | -82.2(7)    |
| C(26)-N(13)-B(3)-N(17)  | 96.0(7)     |
| C(29)-N(15)-B(3)-N(13)  | -85.8(6)    |
| C(30)-N(15)-B(3)-N(13)  | 92.8(6)     |
| C(29)-N(15)-B(3)-N(17)  | 38.8(7)     |
| C(30)-N(15)-B(3)-N(17)  | -142.6(5)   |
| C(33)-N(17)-B(3)-N(13)  | 42.8(7)     |
| C(34)-N(17)-B(3)-N(13)  | -140.3(5)   |

|                         |           |
|-------------------------|-----------|
| C(33)-N(17)-B(3)-N(15)  | -82.1(6)  |
| C(34)-N(17)-B(3)-N(15)  | 94.8(6)   |
| C(45)-N(23)-B(4)-N(21)  | 42.6(7)   |
| C(46)-N(23)-B(4)-N(21)  | -144.3(5) |
| C(45)-N(23)-B(4)-N(19)  | -80.8(6)  |
| C(46)-N(23)-B(4)-N(19)  | 92.4(5)   |
| C(41)-N(21)-B(4)-N(23)  | -91.6(6)  |
| C(42)-N(21)-B(4)-N(23)  | 88.8(6)   |
| C(41)-N(21)-B(4)-N(19)  | 31.8(7)   |
| C(42)-N(21)-B(4)-N(19)  | -147.7(5) |
| C(37)-N(19)-B(4)-N(23)  | 37.1(7)   |
| C(38)-N(19)-B(4)-N(23)  | -145.4(5) |
| C(37)-N(19)-B(4)-N(21)  | -86.9(6)  |
| C(38)-N(19)-B(4)-N(21)  | 90.6(6)   |
| C(26)-N(13)-C(25)-N(14) | -0.4(7)   |
| B(3)-N(13)-C(25)-N(14)  | 178.0(5)  |
| C(26)-N(13)-C(25)-Cu(4) | -177.3(5) |
| B(3)-N(13)-C(25)-Cu(4)  | 1.1(9)    |
| C(27)-N(14)-C(25)-N(13) | 1.9(7)    |
| C(28)-N(14)-C(25)-N(13) | 174.8(6)  |
| C(27)-N(14)-C(25)-Cu(4) | 179.1(5)  |
| C(28)-N(14)-C(25)-Cu(4) | -8.0(9)   |
| Cu(6)-Cu(4)-C(25)-N(13) | 70.4(5)   |
| Cu(5)-Cu(4)-C(25)-N(13) | 16.7(6)   |
| Cu(6)-Cu(4)-C(25)-N(14) | -106.0(5) |
| Cu(5)-Cu(4)-C(25)-N(14) | -159.7(5) |
| C(25)-N(13)-C(26)-C(27) | -1.3(8)   |
| B(3)-N(13)-C(26)-C(27)  | -179.8(6) |
| N(13)-C(26)-C(27)-N(14) | 2.3(9)    |
| C(25)-N(14)-C(27)-C(26) | -2.7(9)   |
| C(28)-N(14)-C(27)-C(26) | -175.6(7) |
| C(31)-N(16)-C(29)-N(15) | 0.6(6)    |
| C(32)-N(16)-C(29)-N(15) | 177.0(5)  |
| C(31)-N(16)-C(29)-Cu(5) | 178.4(4)  |
| C(32)-N(16)-C(29)-Cu(5) | -5.2(7)   |
| C(30)-N(15)-C(29)-N(16) | -0.4(5)   |
| B(3)-N(15)-C(29)-N(16)  | 178.3(5)  |
| C(30)-N(15)-C(29)-Cu(5) | -178.0(4) |

|                         |           |
|-------------------------|-----------|
| B(3)-N(15)-C(29)-Cu(5)  | 0.7(8)    |
| Cu(6)-Cu(5)-C(29)-N(16) | -155.7(4) |
| Cu(4)-Cu(5)-C(29)-N(16) | -108.1(4) |
| Cu(6)-Cu(5)-C(29)-N(15) | 21.5(5)   |
| Cu(4)-Cu(5)-C(29)-N(15) | 69.1(4)   |
| C(29)-N(15)-C(30)-C(31) | 0.1(6)    |
| B(3)-N(15)-C(30)-C(31)  | -178.7(5) |
| N(15)-C(30)-C(31)-N(16) | 0.3(6)    |
| C(29)-N(16)-C(31)-C(30) | -0.6(6)   |
| C(32)-N(16)-C(31)-C(30) | -177.0(5) |
| C(34)-N(17)-C(33)-N(18) | -0.9(6)   |
| B(3)-N(17)-C(33)-N(18)  | 176.3(5)  |
| C(34)-N(17)-C(33)-Cu(6) | 179.8(4)  |
| B(3)-N(17)-C(33)-Cu(6)  | -3.0(8)   |
| C(35)-N(18)-C(33)-N(17) | 1.0(6)    |
| C(36)-N(18)-C(33)-N(17) | 176.5(6)  |
| C(35)-N(18)-C(33)-Cu(6) | -179.6(4) |
| C(36)-N(18)-C(33)-Cu(6) | -4.1(9)   |
| Cu(4)-Cu(6)-C(33)-N(17) | 22.4(6)   |
| Cu(5)-Cu(6)-C(33)-N(17) | 74.0(5)   |
| Cu(4)-Cu(6)-C(33)-N(18) | -156.8(4) |
| Cu(5)-Cu(6)-C(33)-N(18) | -105.2(5) |
| C(33)-N(17)-C(34)-C(35) | 0.5(7)    |
| B(3)-N(17)-C(34)-C(35)  | -177.0(5) |
| N(17)-C(34)-C(35)-N(18) | 0.2(7)    |
| C(33)-N(18)-C(35)-C(34) | -0.7(7)   |
| C(36)-N(18)-C(35)-C(34) | -176.2(7) |
| C(38)-N(19)-C(37)-N(20) | 1.5(5)    |
| B(4)-N(19)-C(37)-N(20)  | 179.2(4)  |
| C(38)-N(19)-C(37)-Cu(4) | -172.0(4) |
| B(4)-N(19)-C(37)-Cu(4)  | 5.7(8)    |
| C(39)-N(20)-C(37)-N(19) | -1.0(6)   |
| C(40)-N(20)-C(37)-N(19) | 176.8(5)  |
| C(39)-N(20)-C(37)-Cu(4) | 173.4(4)  |
| C(40)-N(20)-C(37)-Cu(4) | -8.8(7)   |
| Cu(6)-Cu(4)-C(37)-N(19) | 18.3(5)   |
| Cu(5)-Cu(4)-C(37)-N(19) | 70.0(4)   |
| Cu(6)-Cu(4)-C(37)-N(20) | -154.3(4) |



|                         |           |
|-------------------------|-----------|
| Cu(5)-Cu(4)-C(37)-N(20) | -102.6(4) |
| C(37)-N(19)-C(38)-C(39) | -1.5(6)   |
| B(4)-N(19)-C(38)-C(39)  | -179.4(5) |
| N(19)-C(38)-C(39)-N(20) | 0.8(6)    |
| C(37)-N(20)-C(39)-C(38) | 0.1(6)    |
| C(40)-N(20)-C(39)-C(38) | -177.7(5) |
| C(43)-N(22)-C(41)-N(21) | -0.5(7)   |
| C(44)-N(22)-C(41)-N(21) | 175.3(6)  |
| C(43)-N(22)-C(41)-Cu(5) | 171.5(5)  |
| C(44)-N(22)-C(41)-Cu(5) | -12.7(8)  |
| C(42)-N(21)-C(41)-N(22) | 0.4(6)    |
| B(4)-N(21)-C(41)-N(22)  | -179.2(5) |
| C(42)-N(21)-C(41)-Cu(5) | -171.1(5) |
| B(4)-N(21)-C(41)-Cu(5)  | 9.3(9)    |
| Cu(6)-Cu(5)-C(41)-N(22) | -105.2(5) |
| Cu(4)-Cu(5)-C(41)-N(22) | -151.8(4) |
| Cu(6)-Cu(5)-C(41)-N(21) | 64.7(5)   |
| Cu(4)-Cu(5)-C(41)-N(21) | 18.1(6)   |
| C(41)-N(21)-C(42)-C(43) | -0.1(8)   |
| B(4)-N(21)-C(42)-C(43)  | 179.5(6)  |
| N(21)-C(42)-C(43)-N(22) | -0.2(8)   |
| C(41)-N(22)-C(43)-C(42) | 0.5(8)    |
| C(44)-N(22)-C(43)-C(42) | -175.3(6) |
| C(46)-N(23)-C(45)-N(24) | 1.3(6)    |
| B(4)-N(23)-C(45)-N(24)  | 175.2(5)  |
| C(46)-N(23)-C(45)-Cu(6) | -175.9(4) |
| B(4)-N(23)-C(45)-Cu(6)  | -2.0(8)   |
| C(47)-N(24)-C(45)-N(23) | -1.0(7)   |
| C(48)-N(24)-C(45)-N(23) | 176.9(7)  |
| C(47)-N(24)-C(45)-Cu(6) | 176.2(5)  |
| C(48)-N(24)-C(45)-Cu(6) | -5.8(10)  |
| Cu(4)-Cu(6)-C(45)-N(23) | 75.5(5)   |
| Cu(5)-Cu(6)-C(45)-N(23) | 23.0(6)   |
| Cu(4)-Cu(6)-C(45)-N(24) | -101.1(5) |
| Cu(5)-Cu(6)-C(45)-N(24) | -153.7(5) |
| C(45)-N(23)-C(46)-C(47) | -1.0(7)   |
| B(4)-N(23)-C(46)-C(47)  | -175.4(5) |
| N(23)-C(46)-C(47)-N(24) | 0.4(7)    |

|                         |           |
|-------------------------|-----------|
| C(45)-N(24)-C(47)-C(46) | 0.4(8)    |
| C(48)-N(24)-C(47)-C(46) | -177.5(7) |

---

Symmetry transformations used to generate equivalent atoms:
